# Supplementary material
Source: ML conference proceedings conference paper supplement (https://openaccess.thecvf.com/content/CVPR2021/html/Casas_MP3_A_Unified_CVPR_2021_paper.html)
Supplement: Supplementary file 1 [file Casas_MP3_A_Unified_CVPR_2021_supplemental.zip]

Archive with 3 entries (3 files):
- 07124-supp.pdf
- __MACOSX/._07124-supp.pdf
- 07124-supp.mp4
